# Supplementary material for: Cas14a1-Mediated Nucleic Acid Diagnostics for Spinal Muscular Atrophy
Source: MDPI journal article supplement (doi:10.3390/bios12050268), 2022-04-23
Supplement: s1 [file s1]

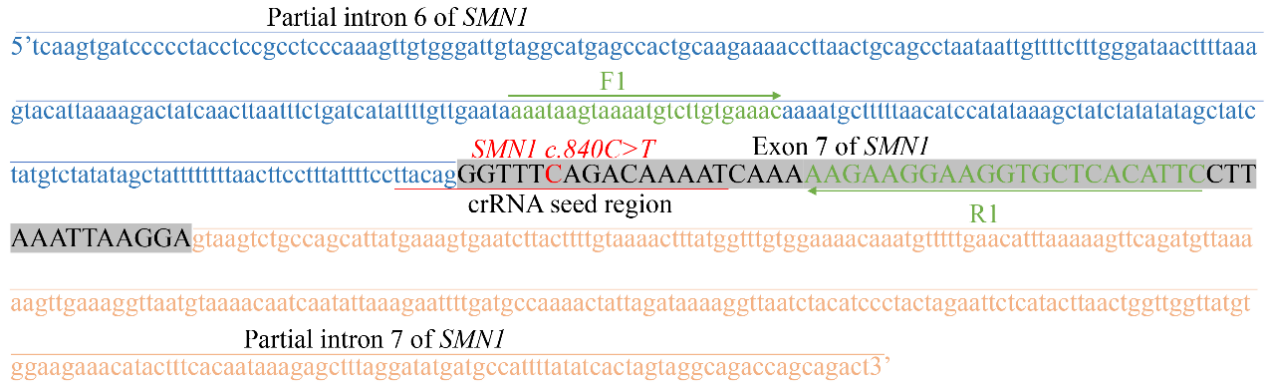

**Figure S1.** Schematic representation of the locations of PCR primers and crRNA seed region. The primers F1 and R1 used for PCR in this study were indicated by green arrows. The *SMN1* c.840C>T was indicated in bold and red. The crRNA seed region was indicated with a red line. The exon 7 of *SMN1* was in gray shadow. The partial intron 6 of *SMN1* was in blue and underlined by a blue line. The partial intron 7 of *SMN1* was in orange and underlined by an orange line.

**Table S1.** Detailed sequences of primers, crRNAs and probes used in this study.

| name.        | Sequence (5' to 3')                                                                                                                                                                                       |
|--------------|-----------------------------------------------------------------------------------------------------------------------------------------------------------------------------------------------------------|
| crRNA        | taatacgactcactataggTTCAGTATAAAGTGGAGAACCGCTTCACCAAAA-GCTGTCCCTTAGGGGATTAGAACTTGAGTGAAGGTGGGCTGCTTGCATCAGCCTAATGTCGAGAAGTGCTTTCTTCGGAAAGTAACCCTCGAAACAAATTCATTTgaaa-GAATGAAGGAATGCAACATTTTGTCTGAAACCctgtaa |
| crRNA-F      | AAATAAGTAAAATGTCTTGTGAAAC                                                                                                                                                                                 |
| crRNA-SMN1-R | GAATGTGAGCACCTTCCTTCTT                                                                                                                                                                                    |
| F1           | AAATAAGTAAAATGTCTTGTGAAAC                                                                                                                                                                                 |
| R1           | GAATGTGAGCACCTTCCTTCTT                                                                                                                                                                                    |
| FQ-21nt      | 5'FAM-TTTTTTTTTTTTTTTTTTTTTT-3'BHQ-X                                                                                                                                                                      |
| FQ-12nt      | 5'FAM-TTTTTTTTTTTT-3'BHQ-X                                                                                                                                                                                |
| SMN1-ssDNA   | ttaacttcctttatttctcttacagGGTTTCAGACAAAATCAAAAAGAAGGAAGGTGC                                                                                                                                                |
